1 **Adaptive shifts underlie the divergence in wing morphology in bombycoid moths**

2

3 Brett R. Aiello<sup>1,2,3</sup>, Milton Tan<sup>4</sup>, Usama Bin Sikandar<sup>5,6</sup>, Alexis J. Alvey<sup>4</sup>, Burhanuddin

4 Bhinderwala<sup>1</sup>, Katalina C. Kimball<sup>2</sup>, Jesse R. Barber<sup>7</sup>, Chris A. Hamilton<sup>8</sup>, Akito Y. Kawahara<sup>3,9,10</sup>,

5 and Simon Sponberg<sup>1,2</sup>

6 <sup>1</sup>*School of Physics, Georgia Institute of Technology, Atlanta, GA 30332, USA.*

7 <sup>2</sup>*School of Biological Sciences, Georgia Institute of Technology, Atlanta, GA 30332, USA.*

8 <sup>3</sup>*Florida Museum of Natural History, University of Florida, Gainesville, FL, 32611, USA.*

9 <sup>4</sup>*Illinois Natural History Survey, Prairie Research Institute, University of Illinois at Urbana-*

10 *Champaign, Champaign, Illinois 61820, USA*

11 <sup>5</sup>*School of Electrical and Computer Engineering, Georgia Institute of Technology, Atlanta, GA*

12 *30332, USA.*

13 <sup>6</sup>*Department of Electrical Engineering, Information Technology University, Lahore, Pakistan*

14 <sup>7</sup>*Department of Biological Sciences, Boise State University, Boise, ID 83725, USA.*

15 <sup>8</sup>*Department of Entomology, Plant Pathology & Nematology, University of Idaho, Moscow, ID*

16 *83844, USA.*

17 <sup>9</sup>*Entomology and Nematology Department, University of Florida, Gainesville, FL, 32608, USA.*

18 <sup>10</sup>*Department of Biology, University of Florida, Gainesville, FL, 32611, USA.*

19

20

21

22

23

24 **Short Title:** Evolution of moth flight morphology

25

26 **Corresponding Author:**

27 Brett Aiello, 837 State Street, Atlanta, Georgia, 30332, [brett.aiello@physics.gatech.edu](mailto:brett.aiello@physics.gatech.edu)

28

29 **Author contributions:**

30 B.R.A. designed research; B.R.A., U.B.S., K.C.K, and C.A.H. performed research; B.R.A., M.T.,  
31 A.J.A., U.B.S., and K.C.K, analyzed data; B.R.A wrote the paper; all authors contributed towards  
32 editing the paper.

33

34 The authors declare no conflict of interest.

35

36 **Keywords:** wing shape, moth, flight, evolution

37

38 **ABSTRACT**

39 The evolution of flapping flight is linked to the prolific success of insects. Across Insecta, wing  
40 morphology diversified, strongly impacting aerodynamic performance. In the presence of  
41 ecological opportunity, discrete adaptive shifts and early bursts are two processes hypothesized  
42 to give rise to exceptional morphological diversification. Here, we use the sister-families  
43 Sphingidae and Saturniidae to answer how the evolution of aerodynamically important traits is  
44 linked to clade divergence and through what process(es) these traits evolve. Many agile  
45 Sphingidae evolved hover-feeding behaviors, while adult Saturniidae lack functional mouth  
46 parts and rely on a fixed energy budget as adults. We find that Sphingidae underwent an  
47 adaptive shift in wing morphology coincident with life history and behavior divergence, evolving  
48 small high aspect-ratio wings advantageous for power reduction that can be moved at high  
49 frequencies, beneficial for flight control. In contrast, Saturniidae, which do not feed as adults,  
50 evolved large wings and morphology which surprisingly does not reduce aerodynamic power,  
51 but could contribute to their erratic flight behavior, aiding in predator avoidance. We suggest  
52 that after the evolution of flapping flight, diversification of wing morphology can be potentiated  
53 by adaptative shifts, shaping the diversity of wing morphology across insects.

54

55

56

## 57 INTRODUCTION

58 The evolution of flight is thought to be a key innovation [1] foundational to the success of  
59 insects, one of the most speciose clades of animals on Earth. In flying insects, flight is critical for  
60 most aspects of life history including dispersal, migration, predator avoidance, feeding, and  
61 courtship behaviors. The flight morphology of flying insects, therefore, likely faces strong  
62 selective forces to meet the functional demands of a species [2, 3]. Selection can act on flight  
63 morphology to significantly impact flight performance [4]. Indeed, flying insects show an  
64 extraordinary diversity of wing and body sizes and shapes [2, 5, 6]. Revealing the phylogenetic  
65 patterns of insect flight morphology and the processes driving its evolution is a prime  
66 opportunity to examine how the evolution of aerodynamically important traits is linked to the  
67 divergence of diverse clades.

68 Clade divergence and the subsequent diversification of lineages and morphology can  
69 occur through different evolutionary processes. In the presence of an ecological opportunity,  
70 the tempo of trait evolution can accelerate and its mode can deviate from a random Brownian  
71 Motion (BM) process, the null model of trait evolution. Early bursts [7-9] and discrete  
72 adaptative shifts [10-12] are two alternative processes hypothesized to give rise to exceptional  
73 morphological diversity. An early burst is associated with the adaptative radiation of a clade  
74 where morphological disparity is established early and followed by a subsequent slowdown in  
75 diversification rate [8, 9]. Adaptive shifts are when discrete shifts occur along a single branch  
76 and are not followed by a slowdown in diversification rate [10-12]. Traits with known functional  
77 consequences (e.g. wing morphology) are more likely to reflect the ecology of a species [13],  
78 and therefore are more likely to be associated with non-BM processes when ecologically

79 distinct clades evolve. Therefore, testing if insect wing and body morphology evolution deviates  
80 from BM and shifts in tandem with life history and behavior will demonstrate the evolutionary  
81 processes driving morphological diversification as clades diverge to occupy different biological  
82 niches.

83 Wing size and shape, as well as body size have known aerodynamic consequences for  
84 maneuverability, force production, and power requirements. Nearly any aspect of shape can  
85 affect aerodynamics, but several metrics of wing morphology are common predictors of flight  
86 performance, notably wing loading ( $W_s$ ), aspect ratio (AR), and radius of the second moment of  
87 area ( $\hat{r}_2$ ). A lower  $W_s$ , the ratio between body mass ( $m_t$ ) and wing area ( $S$ ), typically enhances  
88 maneuverability, increasing the wing force production to body mass ratio, as seen in birds [14-  
89 16], bats [17-19], and moths and butterflies [20, 21]. Larger AR wings (long, slender) can reduce  
90 the power requirements of flight [6, 19, 22], but can also reduce maneuverability [3, 21, 23].  
91 High  $\hat{r}_2$  wings will have more area concentrated distally, which increases force production  
92 because more of the wing is moving more quickly. But high  $\hat{r}_2$  can increase power  
93 requirements and reduce maneuverability [24]. Finally, interspecific variation in wing and body  
94 morphology will have direct consequences for wing beat frequency ( $n$ ) [6, 25]. An increase in  $n$   
95 increases active force generation [26], but at the cost of increasing inertial power ( $P_{acc}$ ), the  
96 power required to oscillate the wing mass [27].

97 The moth superfamily Bombycoidea provides an opportunity to test hypotheses related  
98 to the evolution of flight morphology within closely related, but divergent clades. Bombycoidea  
99 is a globally distributed, diverse clade of more than 5,000 species [28]. The most diverse  
100 families in the Bombycoidea are hawkmoths and wild silk moths (Sphingidae and Saturniidae,

101 respectively); sister families [29-31] of strikingly different life histories and flight behaviors.  
102 Hawkmoths are active, fast flyers [32] known for their maneuverability and hover feeding  
103 behavior [33, 34], where species can successfully track flower oscillations up to 14 Hz [33, 34].  
104 However, hovering requires a high power output [35]. Wild silk moths (here forth “silkmoths”)  
105 display a flight behavior that is often described as bobbing or erratic, but fast and agile when  
106 escaping from predators [32, 36-38]. Silkmoths lack functional mouth parts and must rely on  
107 the strictly finite energy stores, gathered during the larval period, throughout their entire,  
108 albeit short, reproductive adult life stage [38]. The divergence in life history and flight behavior  
109 between hawkmoths and silkmoths represent different niches, and would be expected to have  
110 correlated changes in flight morphology.

111         Here, we focus on the hawkmoths and silkmoths to test if each clade has evolved  
112 distinct flight morphology and determine what evolutionary processes led to extant  
113 morphological disparity. We hypothesize that hawkmoths evolved morphology favorable for  
114 maneuverability in order to rapidly track flower movements during hover feeding, while  
115 silkmoths evolved morphology favorable for power reduction in order to conserve limited  
116 energy as adult stage silkmoths do not feed. We next examine the morphological disparity  
117 through time (DTT) and compare different models of trait evolution to determine the processes  
118 that led to the diversity of extant flight morphology. We hypothesize that the distinct  
119 transitions in life history and flight behavior between hawkmoths and silkmoths were  
120 accompanied by distinct adaptive shifts in flight morphology.

121

122

## 123 MATERIALS AND METHODS

124 We created a time-calibrated Bombycoidea phylogeny, sampling representatives of all families,  
125 following published methods [31]. In total, the phylogenetic dataset of 606 loci included 57  
126 species and one outgroup. The tree was inferred using a maximum likelihood approach and  
127 time calibrated based on the dates of corresponding nodes in a recently published Lepidoptera  
128 phylogeny that relied on 16 fossil calibrations with uniform priors and uncorrelated rates [30].

129

### 130 *Morphometrics*

131 Body and wing morphology was digitized from museum images using StereoMorph  
132 (V1.6.2) [39]. Male specimens were analyzed when available (53 of 57 species); males are  
133 known to exhibit higher flight activity in comparison to females [5, 40]. Eight landmarks  
134 characterized the body; Bézier curves outlined the right forewing and hindwing (Fig. S1).

135 Wing measurements for all species began by re-orienting each wing to a comparable  
136 orientation consistent with known flight position. The forewing was rotated so its long axis was  
137 perpendicular to the long axis of the body. In Sphingidae, the hindwing long axis was also  
138 rotated perpendicular to the long axis of the body; the approximate orientation during flight.  
139 The hindwing of Saturniidae and the “other bombycoid families” were kept in the same  
140 orientation of dried museum specimens, which is the approximate orientation during flight and  
141 provides a consistent and comparable orientation across species. A combined wing outline was  
142 created from the non-overlapping portions of the rotated forewing and hindwing, resampled to  
143 generate 75 evenly spaced points.

144 Analysis of wing shape traits was conducted in Matlab (R2018b–9.5.0.944444). Wing  
145 parameters ( $R$ ,  $\bar{c}$ ,  $S$ ,  $AR$ ,  $\hat{r}_2$ , and  $W_s$ ) were calculated following Ellington [24].  $n$  was estimated  
146 from morphology [25].

147

#### 148 *Phylogenetic comparisons*

149 A phylogenetic principal components analysis (pPCA) [41] was conducted on forewing,  
150 hindwing, and combined shapes. The dominant pPC axes for wing shape were determined using  
151 the broken stick method implemented in the bsDimension function of the PCDimension R  
152 package V 1.1.11 [42].

153 For each trait, we performed a disparity through time (DTT) analysis [8] (1000  
154 simulations); a maximum likelihood estimation of the presence of shifts and their positions  
155 using PhylogeneticEM [43]; and compared the fit of 10 different models of trait evolution using  
156 mvMORPH [44]. These analyses were conducted in RStudio (V1.1.383) using R (V4.0.2).  
157 Unabridged methods are supplementary material. See Table S1 for list of all variables and  
158 derivation. Data is available on Dryad [45].

159

## 160 **RESULTS**

### 161 *Phylogeny*

162 Phylogenetic relationships of the 57 species in this study show a monophyletic, well-supported  
163 clade of the Sphingidae and Saturniidae as sister-lineages, with the Bombycidae as the sister to  
164 those two (Fig. 1A; S2). Relationships are congruent with previous studies [29, 31, 46, 47].

165

166 *Hawkmoths and silkmoths each have diverse, but clustered wing shapes in morphospace.*  
167 We first used a phylogenetic principal components analysis to assess the variation in extant  
168 wing shape in a data-driven, evolutionary framework. For all three wing shapes (forewing,  
169 hindwing, and combined), most of the variation is explained by the first two pPC axes (Fig. 1B-E;  
170 Table S2); pPC three or four explained no more than 14% of the variation (Fig. S3A-D; Table S2).  
171 Hindwing and combined wing morphospaces capture the evolution of hindwing tails in some  
172 silkmoth species, but hawkmoths and silkmoths remain clustered (Fig. 1C-D). When tailed  
173 species (#1, 2, 3, 4, 20, 28) are removed (Fig. 1B), families remain clustered in combined-wing  
174 shape space; variation along pPC1 generally corresponds to AR.

175         The wing shapes of hawkmoths and silkmoths are well separated in morphospace. We  
176 conducted a MANOVA on each wing shape; pPC1-4 scores were the response variables and  
177 clade (hawkmoth; silkmoth; Other Bombycoïd Families, abbreviated O.B.) was the factor. Each  
178 wing shape is significantly separated between clades (Forewing:  $F=14.91, p<10^{-13}$ ; hindwing:  
179  $F=10.84, p<10^{-10}$ ; combined wing:  $F=14.96, p<10^{-13}$ ). Separation persists when considering only  
180 hawkmoths and silkmoths (Forewing:  $F=44.42, p<10^{-14}$ ; hindwing:  $F=10.84, p<10^{-10}$ ; combined  
181 wing:  $F=101.17, p<10^{-15}$ ), and for the combined wing when tailed silkmoths are removed from  
182 the analysis (All families:  $F=16.19, p<10^{-13}$ ; hawkmoths-vs-silkmoths:  $F=144.06, p<10^{-15}$ ).



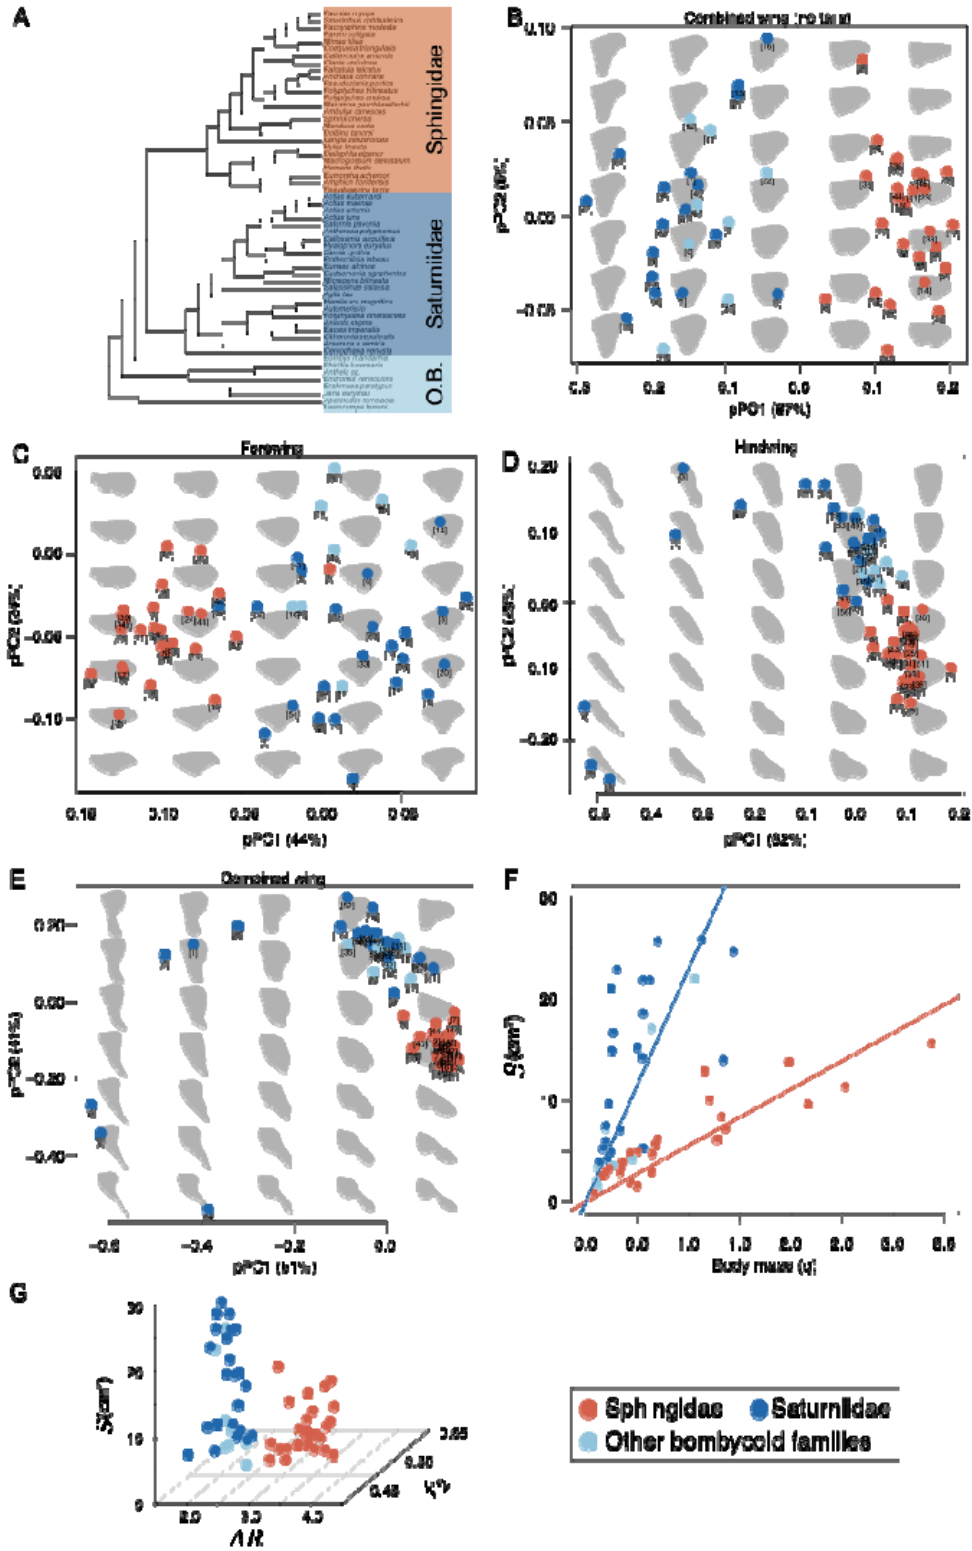

184 Figure 1. The evolution and trajectory of wing shape diversity.

185 (A) The phylogenetic relationships of bombycoids and outgroups (node labels in Fig. S2B).  
186 O.B. refers to Other Bombycoid families (the name we give to all long-branched species that do  
187 not belong to either the Saturniidae or Sphingidae clades). Clade color is consistent across  
188 figures. Projections of shapes from (B) combined wing without tails, (C) forewing, (D) hindwing,  
189 and (E) combined wing onto the first two pPCs demonstrates the separation between extant  
190 hawkmoths and silkmoths (pPC 3 and 4 and species number key in Fig. S3). (F) Wing size and (G)  
191 combined wing functional shape metrics also diverge between hawkmoths and silkmoths.  
192

193 *Wing area is greater in silkmoths than hawkmoths*

194 In addition to shape, we determined if wing size is larger for a given body size between the two  
195 clades. We conducted a linear regression between  $S$  and  $m_t$  (Fig. 1F), constraining the y-  
196 intercept for each family to zero (Hawkmoths:  $r^2=0.90$ ,  $F=234.4$ ,  $p<10^{-13}$ ; Silkmoths:  $r^2=0.75$ ,  
197  $F=66.8$ ,  $p<10^{-7}$ ). An ANCOVA with family as a factor reveals significant differences in regression  
198 slope ( $F=8.732$ ,  $p=0.0005$ ), indicating wing area is larger for a given body size in silkmoths than  
199 hawkmoths. Next, before accounting for phylogeny, the relative wing area of each species  
200 ( $S/m_t$ ) is significantly different between hawkmoths and silkmoths (2-tailed t-test,  $p<10^{-9}$ ). A  
201 comparison of absolute wing area between the clades reinforces these differences (Fig. 1F,G;  
202 S4A,B).

203

204 *Aerodynamic features of the wing and body also separate between clades*

205 To complement the data-driven pPCA and relate variation in wing and body shape and size to  
206 aerodynamic metrics, we next quantified several specific morphological variables:  
207 nondimensional radius of second moment of area ( $\hat{r}_2$ ), aspect ratio (AR), wing loading ( $W_s$ ), and  
208 the fraction of body length occupied by the abdomen ( $\hat{l}_{abd}$ ) and thorax ( $\hat{l}_{tho}$ ). Before  
209 accounting for phylogeny, combined wing AR,  $W_s$ , and  $\hat{r}_2$  are all significantly greater in

210 hawkmoths than in silkmoths (Fig. 1G; Table S3). Finally, while variation in total body length ( $l_b$ )  
211 spans a similar range within each family, clade average  $\hat{l}_{abd}$  is significantly longer in hawkmoths  
212 than silkmoths and  $\hat{l}_{tho}$  is generally greater in silkmoths than in hawkmoths (Table S3). To  
213 further ensure these multiple comparisons did not bias our statistics, we conduct a separate  
214 MANOVA of the wing ( $\hat{r}_2$ , AR,  $W_s$ ) and body ( $\hat{l}_{abd}$ ,  $\hat{l}_{tho}$ ) traits between hawkmoths and  
215 silkmoths and, in both cases, find significant separation between the clades (wing:  $F=107.15$ ,  
216  $p<10^{-15}$ ; body:  $F=11.432$ ,  $p<10^{-5}$ ).

217

218 *Wing beat frequency diverges between hawkmoths and silkmoths.*

219 Wing beat frequency ( $n$ ) is also an important feature of flight that depends on wing and body  
220 size.  $n$ , estimated from scaling relationships (Table S1; Deakin, 2010), is distinct from wing  
221 shape, but not independent of wing and body size (total body mass,  $m_t$ , and the mass of the  
222 wing pair,  $m_w$ , were estimated from museum specimens; see supplemental Fig. S6; Table S5).  
223 Based on morphological differences,  $n$  is significantly greater in hawkmoths ( $n$ : mean $\pm$ SD:  
224  $29.37\pm 9.89$  Hz) compared to silkmoths ( $n$ : mean $\pm$ SD:  $14.34\pm 5.21$ Hz,  $p<0.0001$ ; Table S3).

225

226 *Relative subclade disparity through time (DTT) shows both an early and recent accumulation of*  
227 *morphological diversity*

228 A DTT analysis determines how morphological disparity accumulated over time. The relative  
229 subclade disparity of each shape is similar through time. Early in evolutionary history, relative  
230 subclade disparity is less than expected by BM for all three wings; the lowest values fall just  
231 inside the 95% confidence interval of BM trait simulation at the point when hawkmoths and  
232 silkmoths split (~66 MYA; Fig. 2A-C). From that time, subclade disparity remained relatively

233 static until sharply and significantly rising above BM expectations ~38 MYA (Fig. 2A-C),  
234 indicating younger subclades evolved a greater proportion of modern disparity than expected  
235 under BM. Removing tailed species from the analysis produces a similar result, but the rise in  
236 relative subclade disparity above the BM expectation now occurs more recently (Fig. S4C). The  
237 DTT of combined wing metrics ( $W_s$ ,  $n$ ,  $S/m_t$ ) follow similar patterns (Fig. 2D-H), with the  
238 exception of  $\hat{r}_2$  (Fig. 2E). Notably, relative subclade disparity of AR significantly deviates below  
239 the BM expectation coincident with the divergence of the two sister-clades (Fig. 2D). Again, at  
240 approximately 38 MYA, the disparity of these wing traits begins to rise above the BM  
241 expectation, but only  $S/m_t$  and  $W_s$  significantly rise above the expectation under a BM process  
242 (Fig. 2F-G). A multivariate DTT of normalized functional wing metrics reveals a similar overall  
243 trend (Fig. S5).

244 As relative subclade disparity shifts from consistently low values below the BM  
245 expectation to high values above the BM expectation in recent evolutionary history,  
246 morphological disparity index (MDI) values for each trait are near zero and not statistically  
247 significant (other than AR:  $-0.221 \pm 0.202$ ;  $p=0.022$ ; Table S6). While MDI values of  
248 approximately zero typically indicate a BM process, here, wing morphology deviates from the  
249 BM simulation in both deep and recent time. Instead, our findings suggest that morphological  
250 disparity was established *between* subclades early in the evolutionary history of the group  
251 (indicated by values below the BM expectation) and additional disparity was established within  
252 each subclade in recent time (indicated by values above the BM expectation). While this  
253 pattern deviates from the BM expectation, the two deviations are in opposite directions, which  
254 is why we find an MDI near zero.

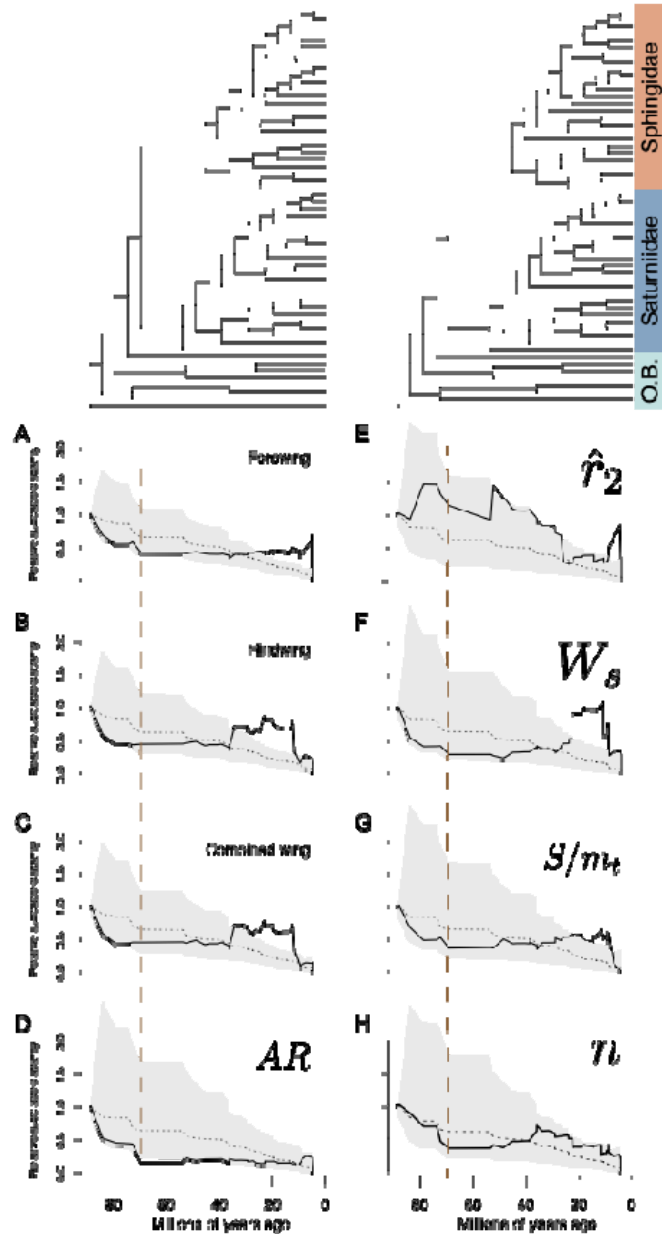

255  
 256 Figure 2. Disparity through time reveals that wing morphology diverged early between the  
 257 clades and additional variation accumulated within each clade in more recent time.  
 258 In each panel, the dashed line represents the median simulated subclade disparity under a  
 259 single rate BM process and includes the 95% confidence interval in grey. The observed relative  
 260 subclade disparity is presented as a solid black line. All traits other than  $r_2$  show a similar trend  
 261 in relative subclade disparity with low values deviating below the BM expectation in the early  
 262 evolutionary history of the clade and high values in recent time. The low values in the early  
 263 history of the clade indicate the disparity between clades was established early and the high  
 264 values in recent history indicate disparity within each clade was established in more recent  
 265 time. The brown vertical dashed line represents the time at which hawkmoths and silkmoths  
 266 split.  
 267

268 *Adaptive shifts account for differences in the evolution of several traits of wing morphology.*

269 Next, we tested whether an adaptive shift is responsible for the divergence in wing shape and  
270 its associated traits between hawkmoths and silkmoths without *a priori* hypotheses of shift  
271 location(s). We found support for an adaptive shift at the ancestral node of the hawkmoth  
272 clade for combined wing shape, AR, and  $W_s$  (Fig. 3A-C). More recent adaptive shifts also  
273 occurred for combined wing shape,  $W_s$ ,  $\hat{r}_2$ ,  $S/m_t$ , and  $n$  (Fig. 3A-F). The recent adaptive shifts in  
274 silkmoth combined wing shape are associated with the independent tail evolutions (Fig. 3A).  
275 The recent adaptive shift for  $n$  occurs in the hawkmoth subfamily, Macroglossinae, known for  
276 its particularly high  $n$  (Fig. 3F). Adaptive shifts did not occur at the ancestral node for either  
277 sister family for combined wing  $\hat{r}_2$ ,  $S/m_t$ , or  $n$ . In the absence of an adaptive shift, a trait can  
278 still have diverged between the sister-clades through other evolutionary processes. However, a  
279 single adaptive shift is inferred at the ancestral hawkmoth node when all functional  
280 (normalized) wing metrics are analyzed together, supporting the findings that hawkmoth wing  
281 morphology undergoes an adaptive shift (Fig. S5).

282

283 *Wing morphology does not evolve under a single-rate Brownian motion process*

284 Next, we determined which model best fit the evolution of combined wing shape and its  
285 associated morphological features. For all traits, the model representing the adaptive shifts  
286 detected in the PhylogeneticEM analysis always fit best (Table S7). However, an adaptive shift  
287 was not detected in the previous analysis at the node for either sister family for  $\hat{r}_2$ ,  $S/m_t$ , or  $n$ ,  
288 and this study is focused on the sister-clade divergence; the absence of an adaptive shift is

289 likely due to the complex selective pressures on these traits that depend on both body and  
290 wing morphology.

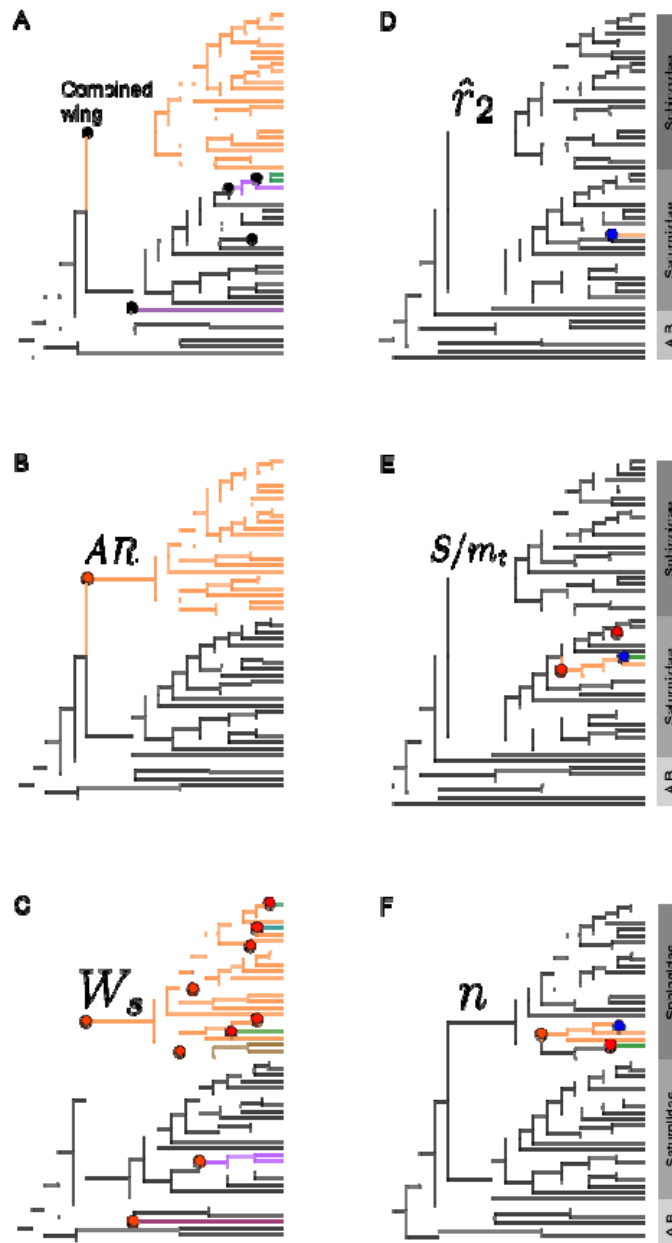

291  
292 Figure 3. An adaptive shift is responsible for divergence in wing shape (A), aspect ratio (B), and  
293 wing loading (C) between hawkmoths and silkmoths. Each branch color indicates a separate  
294 regime (a set of branches evolving under a different set of model parameters). All branches  
295 sharing the same color also share the same evolutionary mode. Shifts to new regimes are  
296 indicated by dots. For univariate traits, red dots indicate shifts to a larger trait value optima and  
297 blue dots indicate shifts to a smaller trait value. Black dots are used for shifts in multivariate  
298 traits, but do not indicate a direction.

299

## 300 DISCUSSION

301 Flight morphology can have a strong influence on the aerodynamic performance of flying  
302 animals. We find that early in the evolutionary history of the moth superfamily Bombycoidea,  
303 wing shape and size were generally conserved until the ancestors of the hawkmoth and  
304 silkmoth sister clades rapidly diverged (Fig. 3A-C), which is consistent with the early  
305 establishment of morphological disparity *between* clades (Fig. 2).

306 The evolutionary split between these two families has been dated to have occurred  
307 approximately 66 (confidence interval: 56.9 to 75.4) million years ago [30], suggesting that  
308 these wing morphology trajectories may have been evolving since then. The initial divergence  
309 in wing morphology between hawkmoths and silkmoths was followed by subsequent  
310 diversification within each group, indicated by the rise in relative subclade disparity above a BM  
311 expectation coinciding with the more recent speciation events occurring within each family (Fig.  
312 2). However, despite recent diversification, wing morphology did not converge between the  
313 two sister-families, indicated by the strong separation between the families in phylogenetic  
314 morphospace (Fig. 1).

315 Even specific species that converged in life history did not fully converge to employ  
316 overlapping wing shapes. For example, while the majority of hawkmoths are known for their  
317 hovering nectaring behavior as adults, members of the hawkmoth subfamily, Smerinthinae  
318 (Node 67; Fig. 1A, S2B), have lost the ability to feed as adults [38], convergent with silkmoths.  
319 However, the combined wing morphology (shape, size, and most associated traits) of  
320 Smerinthinae species (Node 67 in Fig. S2B) remains divergent from silkmoths, implying that  
321 Smerinthinae wing morphology is constrained by its evolutionary history. Finally, while we



322 chose species to broadly cover the groups within bombycoids, sampling is far from complete.  
323 Therefore, we remain conservative in our interpretation, focusing on the split between  
324 hawkmoths and silkmoths for which we were able to accumulate broad sampling for our  
325 analysis. In sum, these data provide phylogenetic evidence supporting our hypothesis that  
326 distinct flight morphology evolved in each sister clade.

327

328 *The evolutionary divergence of wing morphology has implications for flight performance.*

329         Given that the hawkmoth and silkmoth clades diverged in wing morphology, we can  
330 explore the consequences of these two morphologies for flight performance. While flight  
331 performance depends on many other factors, most notably wing movement, shape and size do  
332 have implications for aerodynamics. Contrary to our expectations, we did not observe  
333 morphological changes that were consistent with extreme maneuverability in hawkmoths and  
334 extreme power reduction in silkmoths. Hawkmoths, known to be maneuverable hover feeders,  
335 have evolved small wings of high AR,  $W_s$ , and  $\hat{r}_2$ ; all metrics typically associated with power  
336 reduction, efficient force production, and lower degrees of maneuverability. In contrast,  
337 silkmoths, a group that does not feed as adults and is known for its bobbing (erratic) flight  
338 behavior, have evolved large wings of low AR,  $W_s$ , and  $\hat{r}_2$ .

339

340 *Hawkmoth wing morphology likely reduces power without sacrificing maneuverability*

341         The high AR and  $\hat{r}_2$  wings of hawkmoths might act to reduce power and increase force  
342 production efficiency while *not* sacrificing maneuverability in comparison to silkmoths that are  
343 employing wings of lower AR and  $\hat{r}_2$ . All else being equal, high AR and  $\hat{r}_2$  wings will reduce the

344 induced power ( $P_{ind}$ ) requirements of flight [6, 19, 22] and increase force production efficiency  
345 [5, 48, 49], respectively. However, both traits could come at the cost of reduced  
346 maneuverability due to an increase in the moments of inertia of the wing pair [3, 5, 6, 21, 23].  
347 For a wing of constant area, uniform thickness, and density, a larger AR and  $\hat{r}_2$  will necessarily  
348 make the wing longer (increasing AR) while also concentrating more area distally along the  
349 span of the wing (increasing  $\hat{r}_2$ ). Both scenarios correspond to an increase in wing moments of  
350 inertia, suggesting silkmoths should be more maneuverable than hawkmoths [5, 24]. However,  
351 wing size will also have a strong impact on wing moment of inertia, and silkmoths have evolved  
352 larger wings (per body size) than hawkmoths (Fig. 1F-G; Table S3). Hawkmoths evolved high AR  
353 by reducing mean chord length,  $\bar{c}$ , rather than through an increase in wing span,  $R$  (Fig. 1B;  
354 Table S4). Therefore, while selection for economical flight (increased AR) might often reduce  
355 maneuverability, the evolution of small, high AR wings in the hawkmoth clade (achieved  
356 through a reduction in  $\bar{c}$ ) could act to increase economy while not necessarily sacrificing  
357 maneuverability.

358         The potential cost of small wing size is that proportionally smaller wings could reduce  
359 wing stroke-averaged aerodynamic force production, if wing movement remains constant.  
360 However, in flapping or revolving wings, when all other things are equal, the greater  $\hat{r}_2$  and  $n$   
361 (inferred through scaling relationships) of hawkmoths would increase their magnitude of  
362 torque production relative to silkmoths. The velocity of a wing section increases with its  
363 distance from the axis of rotation, and aerodynamic force production is proportional to velocity  
364 squared. Therefore, shifting more area distally (increasing  $\hat{r}_2$ ) and moving the wing at higher  
365 speeds (increasing  $n$ ) will increase aerodynamic force production [e.g. 26, 48, 49]. Additionally,

366 increasing  $n$  allows for more frequent modification of force vectors, which could enhance flight  
367 control and maneuverability. Natural selection could thus act on wing shape, size, and  
368 frequency (tradeoffs through scaling relationships) to modify the means of force production,  
369 power, and flight control across species.

370

371 *Lower wing loading ( $W_s$ ) in silkmoths could contribute to maneuverability and erratic flight*

372 It is possible that inter-clade differences in  $W_s$  contribute to inter-clade differences in  
373 flight behavior between families. A lower  $W_s$  increases both maneuverability [14-21] and flight  
374 path unpredictability [50]. Silkmoths, which evolved significantly lower  $W_s$  in comparison to  
375 hawkmoths (Fig. 1G, Table S3), are well known for their erratic flight patterns [32, 38] where  
376 vertical position is regularly changing throughout their flight bout. An erratic, or unpredictable  
377 flight path, can enhance predator avoidance [15, 51], and therefore, survival and fitness. In  
378 hummingbird flight, positional predictability and  $W_s$  are positively correlated where  
379 hummingbirds with lower wing loading are less predictable [50]. If the relationship between  $W_s$   
380 and predictability is true in other systems, then the divergence in  $W_s$  between hawkmoths and  
381 silkmoths is precisely the expectation based on the divergence in flight behavior between the  
382 two clades. Therefore, it's likely that evolution of silkmoth wing morphology, particularly low  
383  $W_s$ , is directly tied to the production of erratic flight patterns and the ability to avoid predation.

384

385 *Body shape evolution might aid predator avoidance in silkmoths*

386 Next, we examined the implications of body size evolution for flight performance. In  
387 comparison to hawkmoths, silkmoths have a shorter  $l_b$  and a longer thorax compared to the

388 abdomen, thereby decreasing  $I_{yy}$  and  $I_{zz}$  of the body and likely increasing maneuverability.  
389 These patterns could allow silkmoths greater angular accelerations during pitch and yaw  
390 maneuvers and might be complemented by a reduction in the distance between the center of  
391 mass and wing hinge [52]. Indeed, species of neotropical butterflies equipped with a shorter  
392 abdomen and larger thorax were more successful at evading predators than species with  
393 shorter thoraces and longer abdomens [52]. Therefore, in addition to wing elaborations [32, 38,  
394 46] and bobbing flight behavior [32, 36-38], our data suggest that the evolution of a large  
395 thorax and short abdomen is an additional mechanism contributing to predator avoidance in  
396 silkmoths.

397

398 *Adaptive shifts are responsible for the divergence in wing morphology between hawkmoths and*  
399 *silkmoths*

400 An adaptive shift is found at the stem of hawkmoths for both wing shape, AR, and  $W_s$  (Fig. 3A-  
401 C), indicating that the shape and relative size of hawkmoth wings are evolving around an  
402 adaptive peak. Although disparity was established early in the evolutionary history of the clade  
403 (Fig. 2), rather than slow down in diversification rate, which would occur in an early burst [8, 9],  
404 the initial divergence in life history and flight morphology gives rise to the accumulation of  
405 additional disparity within each clade in recent time (Fig. 2). Indeed, the recent accumulation of  
406 disparity within a subclade is associated with evolution around an adaptive peak [53], and the  
407 absence of evidence for an early burst in the diversification of wing morphology is consistent  
408 with major inter-continental radiations in other systems [7, 10, 11].

409           The discrete adaptive shift in hawkmoth wing morphology parallels the evolution of the  
410 hover feeding behavior in hawkmoths and the loss of adult-stage feeding in silkmoths. The  
411 adaptive shift in hawkmoth wing morphology to small, slender wings of high AR that can be  
412 moved at high frequencies might be directly related to the evolution of hover feeding, which  
413 requires enhanced flight control and high power output [35], as high AR wings are known to  
414 reduce flight power requirements [6].

415           An adaptive shift at the stem of hawkmoths was not found for all wing morphology  
416 traits, suggesting a potential decoupling of the processes, and, therefore, selective pressures,  
417 driving the evolution of overall wing shape, size, and specific features. It should not be expected  
418 that all features of wing morphology evolve under the same process. Wing metrics, like  $\hat{r}_2$ ,  
419 which is related to force production efficiency [24], appear to be more conserved, and those  
420 related to both wing and body size, like  $n$  and  $S/m_t$ , might be under particularly complex  
421 selective pressures.

422           Differently, an adaptive shift was never found for any trait at the stem of the silkmoth  
423 clade, which could be expected given the less drastic separation in wing morphology traits  
424 between silkmoths and the other bombycoid families (Fig. 2). In contrast, more recent adaptive  
425 shifts were detected and associated with the evolution of hindwing tails in silkmoths (Fig. 3A)  
426 and high  $n$  in diurnal hawkmoths (Fig. 3F). While these recent shifts need to be supported  
427 through further sampling within these specific groups, it is exciting that they might be indicative  
428 of recent shifts in flight morphology within these clades, providing a potential opportunity to  
429 identify specialized species or subclades for future functional studies in live animals.

430           The overall combined wing morphology is derived from two functionally linked and  
431 overlapping wing structures (forewing and hindwing) that can each potentially evolve  
432 independently in size and shape, unlocking additional complexities unachievable by a single  
433 wing alone. While forewing and hindwing morphology also diverge between groups, the  
434 absolute values of these traits are different between the fore- and hindwing (Fig. S4). Different  
435 components of the same functional system often evolve at different tempos and modes [54],  
436 raising questions of whether or not certain aspects of wing morphology constitute evolutionary  
437 modules. The integration of techniques from developmental and evolutionary biology will be  
438 particularly fruitful when investigating the modularity of insect wing units.

439

#### 440 *Conclusion*

441           Silkmoths and hawkmoths evolved distinct flight morphology through an adaptive shift  
442 in hawkmoth wing morphology, which occurred in parallel to the evolution of the hover feeding  
443 behavior in hawkmoths. The sister-clade divergence of wing morphology metrics, which are  
444 historically derived for fixed-winged aircrafts, is not totally consistent with initial expectations  
445 of flight performance based on the life history of species in each clade. However, aerodynamic  
446 performance emerges from the interaction of wing shape, size, and movement [6, 55], and it is  
447 likely that hawkmoths achieve high levels of flight control through high  $n$  and other kinematic  
448 adjustments. Our findings indicate that aerodynamically important morphological traits can  
449 experience drastic shifts in parallel to the divergence in life history and flight behavior. While  
450 the evolution of flapping flight in insects is thought to be a key innovation [1], diversification

451 can be further potentiated by more recent adaptive shifts, helping to shape the diversity of  
452 wing morphology seen across extant aerial animals.

453

454 **Acknowledgments:**

455 We thank Stephanie Gage, Jeff Gau, Marc Guasch, Megan Matthews, Izaak Neveln, David  
456 Plotkin, Joy Putney, Juliette Rubin, Varun Sharma, Ryan St Laurent, and Travis Tune for helpful  
457 discussion and/or feedback on the manuscript, Aaron Olsen for assistance with image  
458 digitization and analysis, Talia Moore, and Sarah Friedman for advice on phylogenetic methods,  
459 and Laurel Kaminsky for assistance in imaging museum specimens.

460

461 **Funding:**

462 This work was supported by the National Science Foundation under a Postdoctoral Research  
463 Fellowships in Biology DBI #1812107 to B.R.A., a Faculty Early Career Development Award  
464 #1554790 to S.S., and grants DBI #1349345, DEB #1557007, IOS #1920895 to A.Y.K., IOS  
465 1920936 to J.R.B., and a Dunn Family Professorship to S.S.

466

467

468

469

470

471

472

473 **REFERENCES**

- 474 [1] Nicholson, D.B., Ross, A.J. & Mayhew, P.J. 2014 Fossil evidence for key innovations in the  
475 evolution of insect diversity. *Proceedings. Biological sciences / The Royal Society* **281**.  
476 (doi:10.1098/rspb.2014.1823).
- 477 [2] Wootton, R.J. 1992 Functional-Morphology of Insect Wings. *Annu Rev Entomol* **37**, 113-140.  
478 (doi:10.1146/Annurev.En.37.010192.000553).
- 479 [3] DeVries, P.J., Penz, C.M. & Hill, R.I. 2010 Vertical distribution, flight behaviour and evolution  
480 of wing morphology in Morpho butterflies. *J Anim Ecol* **79**, 1077-1085. (doi:10.1111/j.1365-  
481 2656.2010.01710.x).
- 482 [4] Ray, R.P., Nakata, T., Henningsson, P. & Bompfrey, R.J. 2016 Enhanced flight performance  
483 by genetic manipulation of wing shape in *Drosophila*. *Nature communications* **7**, 10851.  
484 (doi:10.1038/ncomms10851).
- 485 [5] Le Roy, C., Debat, V. & Llaurens, V. 2019 Adaptive evolution of butterfly wing shape: from  
486 morphology to behaviour. *Biol Rev* **94**, 1261-1281. (doi:10.1111/brv.12500).
- 487 [6] Dudley, R. 2000 *The biomechanics of insect flight: form, function, evolution*. Princeton, N.J.,  
488 Princeton University Press.
- 489 [7] Harmon, L.J., Losos, J.B., Davies, T.J., Gillespie, R.G., Gittleman, J.L., Jennings, W.B., Kozak,  
490 K.H., McPeck, M.A., Moreno-Roark, F., Near, T.J., et al. 2010 Early Bursts of Body Size and Shape  
491 Evolution Are Rare in Comparative Data. *Evolution; international journal of organic evolution*  
492 **64**, 2385-2396. (doi:10.1111/j.1558-5646.2010.01025.x).
- 493 [8] Harmon, L.J., Schulte, J.A., Larson, A. & Losos, J.B. 2003 Tempo and mode of evolutionary  
494 radiation in iguanian lizards. *Science* **301**, 961-964. (doi:10.1126/science.1084786).
- 495 [9] Gavrilets, S. & Losos, J.B. 2009 Adaptive Radiation: Contrasting Theory with Data. *Science*  
496 **323**, 732-737. (doi:10.1126/science.1157966).
- 497 [10] Arbour, J.H., Curtis, A.A. & Santana, S.E. 2019 Signatures of echolocation and dietary  
498 ecology in the adaptive evolution of skull shape in bats. *Nature communications* **10**.  
499 (doi:10.1038/s41467-019-09951-y).
- 500 [11] Cooney, C.R., Bright, J.A., Capp, E.J.R., Chira, A.M., Hughes, E.C., Moody, C.J.A., Nouri, L.O.,  
501 Varley, Z.K. & Thomas, G.H. 2017 Mega-evolutionary dynamics of the adaptive radiation of  
502 birds. *Nature* **542**, 344-+. (doi:10.1038/nature21074).
- 503 [12] Simpson, G.G. 1944 *Tempo and mode in evolution*. New York, NY, Columbia University  
504 Press.



- 505 [13] Wainwright, P.C. 2007 Functional versus morphological diversity in macroevolution. *Annual*  
506 *Review of Ecology Evolution and Systematics* **38**, 381-401.  
507 (doi:10.1146/annurev.ecolsys.38.091206.095706).
- 508 [14] Burns, J.G. & Ydenberg, R.C. 2002 The effects of wing loading and gender on the escape  
509 flights of least sandpipers (*Calidris minutilla*) and western sandpipers (*Calidris mauri*). *Behav*  
510 *Ecol Sociobiol* **52**, 128-136. (doi:10.1007/s00265-002-0494-y).
- 511 [15] Hedenstrom, A. & Rosen, M. 2001 Predator versus prey: on aerial hunting and escape  
512 strategies in birds. *Behav Ecol* **12**, 150-156. (doi:10.1093/beheco/12.2.150).
- 513 [16] Dakin, R., Segre, P.S., Straw, A.D. & Altshuler, D.L. 2018 Morphology, muscle capacity, skill,  
514 and maneuvering ability in hummingbirds. *Science* **359**, 653-657.  
515 (doi:10.1126/science.aao7104).
- 516 [17] Aldridge, H.D.J.N. 1987 Turning Flight of Bats. *J Exp Biol* **128**, 419-425.
- 517 [18] Norberg, U. 1990 *Vertebrate flight: mechanics, physiology, morphology, ecology and*  
518 *evolution*. Berlin, Springer-Verlag.
- 519 [19] Norberg, U.M. & Rayner, J.M.V. 1987 Ecological Morphology and Flight in Bats (Mammalia,  
520 Chiroptera) - Wing Adaptations, Flight Performance, Foraging Strategy and Echolocation. *Philos*  
521 *T R Soc B* **316**, 337-419.
- 522 [20] Berwaerts, K., Van Dyck, H. & Aerts, P. 2002 Does flight morphology relate to flight  
523 performance? An experimental test with the butterfly *Pararge aegeria*. *Funct Ecol* **16**, 484-491.  
524 (doi:10.1046/j.1365-2435.2002.00650.x).
- 525 [21] Betts, C.R. & Wootton, R.J. 1988 Wing Shape and Flight Behavior in Butterflies  
526 (Lepidoptera, Papilionoidea and Hesperioidea)-A-Preliminary-Analysis. *J Exp Biol* **138**, 271-288.
- 527 [22] Pennycuik, C.J. 1968 Power Requirements for Horizontal Flight in Pigeon *Columba Livia*. *J*  
528 *Exp Biol* **49**, 527.
- 529 [23] Cespedes, A., Penz, C.M. & DeVries, P.J. 2015 Cruising the rain forest floor: butterfly wing  
530 shape evolution and gliding in ground effect. *J Anim Ecol* **84**, 808-816. (doi:10.1111/1365-  
531 2656.12325).
- 532 [24] Ellington, C.P. 1984 The Aerodynamics of Hovering Insect Flight .2. Morphological  
533 Parameters. *Philos T Roy Soc B* **305**, 17-40. (doi:10.1098/Rstb.1984.0050).
- 534 [25] Deakin, M.A.B. 2010 Formulae for insect wingbeat frequency. *J Insect Sci* **10**.
- 535 [26] Hedrick, T.L., Cheng, B. & Deng, X. 2009 Wingbeat time and the scaling of passive rotational  
536 damping in flapping flight. *Science* **324**, 252-255. (doi:10.1126/science.1168431).

- 537 [27] Ellington, C.P. 1984 The Aerodynamics of Hovering Insect Flight .6. Lift and Power  
538 Requirements. *Philos T Roy Soc B* **305**, 145-181. (doi:10.1098/Rstb.1984.0054).
- 539 [28] Kitching, I.J., Rougerie, R., Zwick, A., Hamilton, C.A., St Laurent, R.A., Naumann, S., Mejia,  
540 L.B. & Kawahara, A.Y. 2018 A global checklist of the Bombycoidea (Insecta: Lepidoptera).  
541 *Biodivers Data J* **6**. (doi:10.3897/BDJ.6.e22236).
- 542 [29] Breinholt, J.W., Earl, C., Lemmon, A.R., Lemmon, E.M., Xiao, L. & Kawahara, A.Y. 2018  
543 Resolving Relationships among the Megadiverse Butterflies and Moths with a Novel Pipeline for  
544 Anchored Phylogenomics. *Syst Biol* **67**, 78-93. (doi:10.1093/sysbio/syx048).
- 545 [30] Kawahara, A.Y., Plotkin, D., Espeland, M., Meusemann, K., Toussaint, E.F.A., Donath, A.,  
546 Gimnich, F., Frandsen, P.B., Zwick, A., dos Reis, M., et al. 2019 Phylogenomics reveals the  
547 evolutionary timing and pattern of butterflies and moths. *P Natl Acad Sci USA* **116**, 22657-  
548 22663. (doi:10.1073/pnas.1907847116).
- 549 [31] Hamilton, C.A., St Laurent, R.A., Dexter, K., Kitching, I.J., Breinholt, J.W., Zwick, A.,  
550 Timmermans, M., Barber, J.R. & Kawahara, A.Y. 2019 Phylogenomics resolves major  
551 relationships and reveals significant diversification rate shifts in the evolution of silk moths and  
552 relatives. *BMC Evol Biol* **19**, 182. (doi:10.1186/s12862-019-1505-1).
- 553 [32] Janzen, D. 1984 Two ways to be a tropical big moth: Santa Rosa saturniids and sphingids. In  
554 *Oxford surveys in evolutionary biology* (ed. D.R.R. M), pp. 85-140. Oxford, Oxford University  
555 Press.
- 556 [33] Sponberg, S., Dyhr, J.P., Hall, R.W. & Daniel, T.L. 2015 Luminance-dependent visual  
557 processing enables moth flight in low light. *Science* **348**, 1245-1248.  
558 (doi:10.1126/science.aaa3042).
- 559 [34] Stöckl, A.L., Kihlstrom, K., Chandler, S. & Sponberg, S. 2017 Comparative system  
560 identification of flower tracking performance in three hawkmoth species reveals adaptations  
561 for dim light vision. *Philosophical transactions of the Royal Society of London. Series B,*  
562 *Biological sciences* **372**. (doi:10.1098/rstb.2016.0078).
- 563 [35] Willmott, A.P. & Ellington, C.P. 1997 The mechanics of flight in the hawkmoth *Manduca*  
564 *sexta*. II. Aerodynamic consequences of kinematic and morphological variation. *J Exp Biol* **200**,  
565 2723-2745.
- 566 [36] Jacobs, D. & Bastian, A. 2016 *Predator-prey interactions: co-evolution between bats and*  
567 *their prey*. Cham, Switzerland, Springer.
- 568 [37] Lewis, F.P., Fullard, J.H. & Morrill, S.B. 1993 Auditory Influences on the Flight Behavior of  
569 Moths in a Nearctic Site .2. Flight Times, Heights, and Erraticism. *Can J Zool* **71**, 1562-1568.  
570 (doi:10.1139/z93-221).

- 571 [38] Tuskes, P., Tuttle, J. & Collins, M. 1996 *The Wild Silk Moths of North America: A Natural*  
572 *History of the Saturniidae of the United States and Canada*. Ithica, NY, Cornell University Press.
- 573 [39] Olsen, A.M. & Westneat, M.W. 2015 StereoMorph: an R package for the collection of 3D  
574 landmarks and curves using a stereo camera set-up. *Methods Ecol Evol* **6**, 351-356.  
575 (doi:10.1111/2041-210X.12326).
- 576 [40] Gilchrist, G.W. 1990 The Consequences of Sexual Dimorphism in Body Size for Butterfly  
577 Flight and Thermoregulation. *Funct Ecol* **4**, 475-487. (doi:10.2307/2389315).
- 578 [41] Revell, L.J. 2009 Size-Correction and Principal Components for Interspecific Comparative  
579 Studies. *Evolution; international journal of organic evolution* **63**, 3258-3268.  
580 (doi:10.1111/j.1558-5646.2009.00804.x).
- 581 [42] Wang, M., Kornblau, S.M. & Coombes, K.R. 2018 Decomposing the Apoptosis Pathway Into  
582 Biologically Interpretable Principal Components. *Cancer Inform* **17**. (doi:Artn  
583 1176935118771082  
584 10.1177/1176935118771082).
- 585 [43] Bastide, P., Ane, C., Robin, S. & Mariadassou, M. 2018 Inference of Adaptive Shifts for  
586 Multivariate Correlated Traits. *Syst Biol* **67**, 662-680. (doi:10.1093/sysbio/syy005).
- 587 [44] Clavel, J., Escarguel, G. & Merceron, G. 2015 mvMORPH: an R package for fitting  
588 multivariate evolutionary models to morphometric data. *Methods Ecol Evol* **6**, 1311-1319.  
589 (doi:10.1111/2041-210x.12420).
- 590 [45] Aiello, B., Tan, M.H., Sikandar, U.B., Alvey, A.J., Bhinderwala, B., Kimball, K.C., Barber, J.R.,  
591 Hamilton, C.A., Kawahara, A.Y. & Sponberg, S. 2021 Adaptive shifts underlie the divergence in  
592 wing morphology in bombycoid moths, Dryad, Dataset,  
593 <https://doi.org/10.5061/dryad.fj6q573v7>. (
- 594 [46] Barber, J.R., Leavell, B.C., Keener, A.L., Breinholt, J.W., Chadwell, B.A., McClure, C.J.W., Hill,  
595 G.M. & Kawahara, A.Y. 2015 Moth tails divert bat attack: Evolution of acoustic deflection. *P Natl*  
596 *Acad Sci USA* **112**, 2812-2816. (doi:10.1073/pnas.1421926112).
- 597 [47] Kawahara, A.Y. & Barber, J.R. 2015 Tempo and mode of antibat ultrasound production and  
598 sonar jamming in the diverse hawkmoth radiation. *P Natl Acad Sci USA* **112**, 6407-6412.  
599 (doi:10.1073/pnas.1416679112).
- 600 [48] Fernandez, M.J., Driver, M.E. & Hedrick, T.L. 2017 Asymmetry costs: effects of wing  
601 damage on hovering flight performance in the hawkmoth *Manduca sexta*. *J Exp Biol* **220**, 3649-  
602 3656. (doi:10.1242/jeb.153494).
- 603 [49] Muijres, F.T., Iwasaki, N.A., Elzinga, M.J., Melis, J.M. & Dickinson, M.H. 2017 Flies  
604 compensate for unilateral wing damage through modular adjustments of wing and body  
605 kinematics. *Interface Focus* **7**. (doi:10.1098/rsfs.2016.0103).

- 606 [50] Berberi, I., Segre, P.S., Altshuler, D.L. & Dakin, R. 2020 Unpredictable hummingbirds: Flight  
607 path entropy is constrained by speed and wing loading *bioRxiv* **2020.08.11.246926**.  
608 (doi:<https://doi.org/10.1101/2020.08.11.246926>).
- 609 [51] Humphries, D.A. & Driver, P.M. 1970 Protean Defence by Prey Animals. *Oecologia* **5**, 285-&.  
610 (doi:Doi 10.1007/Bf00815496).
- 611 [52] Srygley, R.B. & Dudley, R. 1993 Correlations of the Position of Center of Body-Mass with  
612 Butterfly Escape Tactics. *J Exp Biol* **174**, 155-166.
- 613 [53] Lopez-Fernandez, H., Arbour, J.H., Winemiller, K.O. & Honeycutt, R.L. 2013 Testing for  
614 Ancient Adaptive Radiations in Neotropical Cichlid Fishes. *Evolution; international journal of*  
615 *organic evolution* **67**, 1321-1337. (doi:10.1111/evo.12038).
- 616 [54] Evans, K.M., Taylor, S. & Fenolio, D.B. 2019 Bony patchwork: Mosaic Patterns of Evolution  
617 in the Teleost Skull. *Integrative and comparative biology* **59**, E64-E64.
- 618 [55] Warrick, D.R. & Dial, K.P. 1998 Kinematic, aerodynamic and anatomical mechanisms in the  
619 slow, maneuvering flight of pigeons. *J Exp Biol* **201**, 655-672.  
620

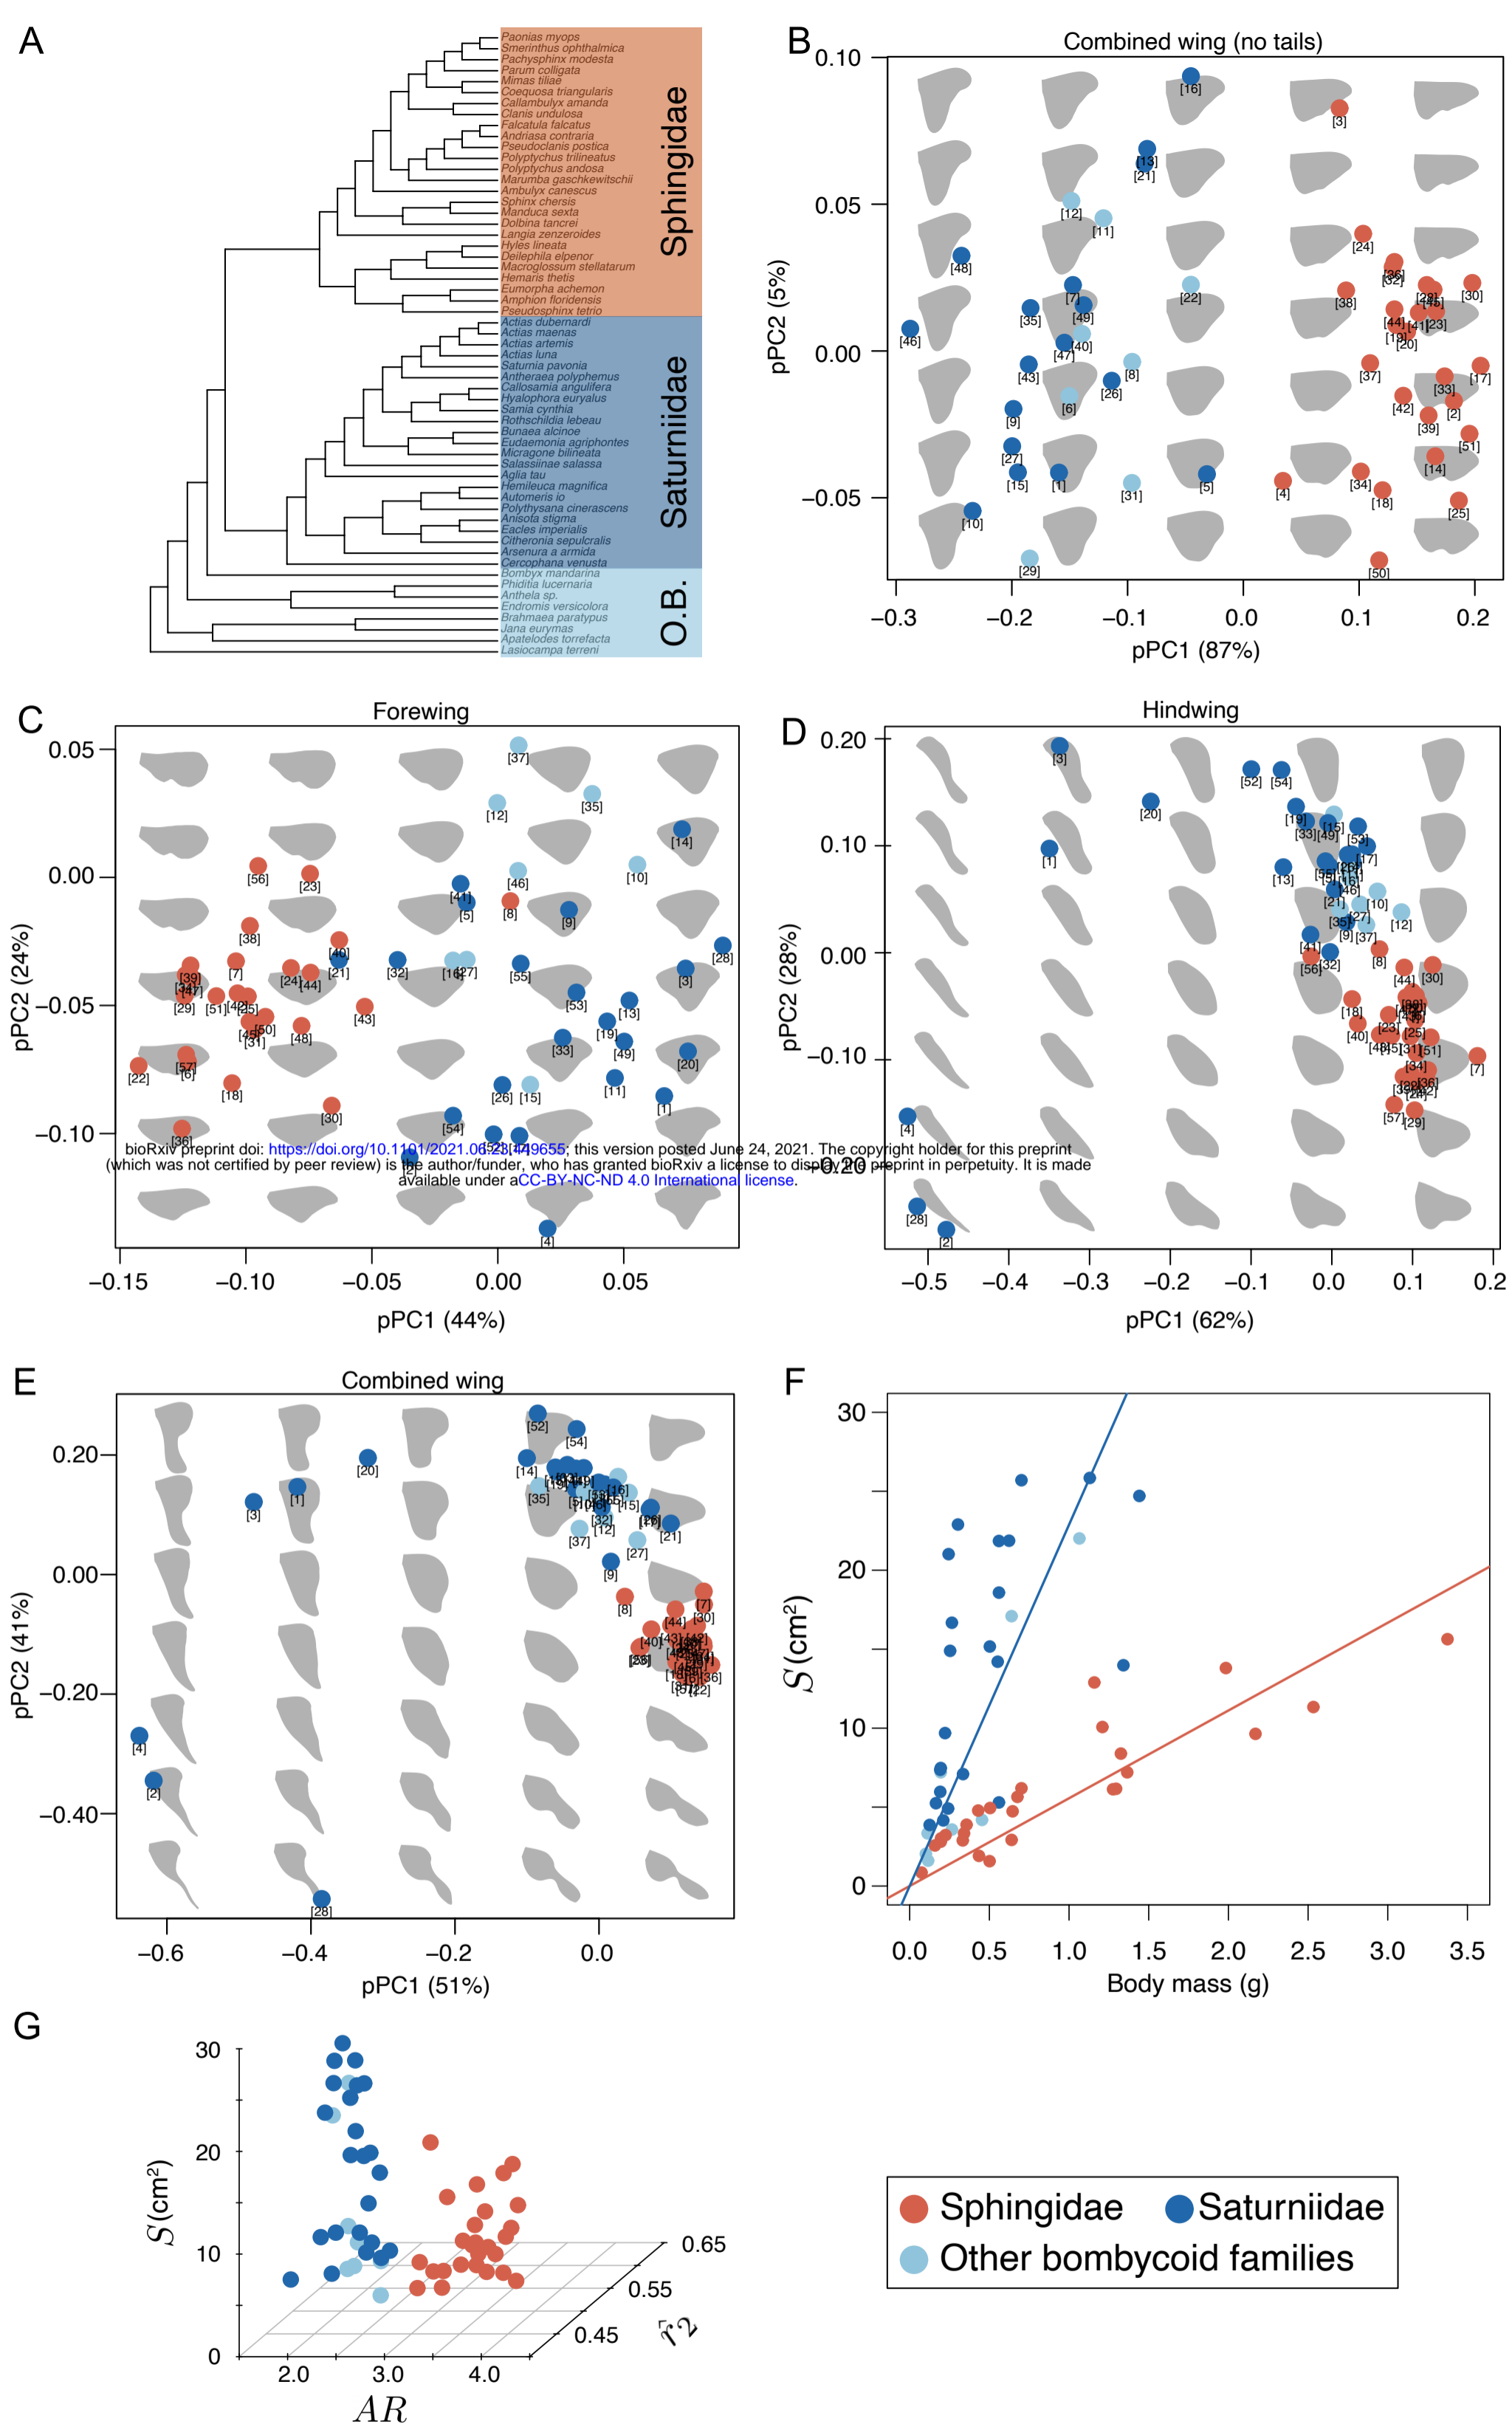

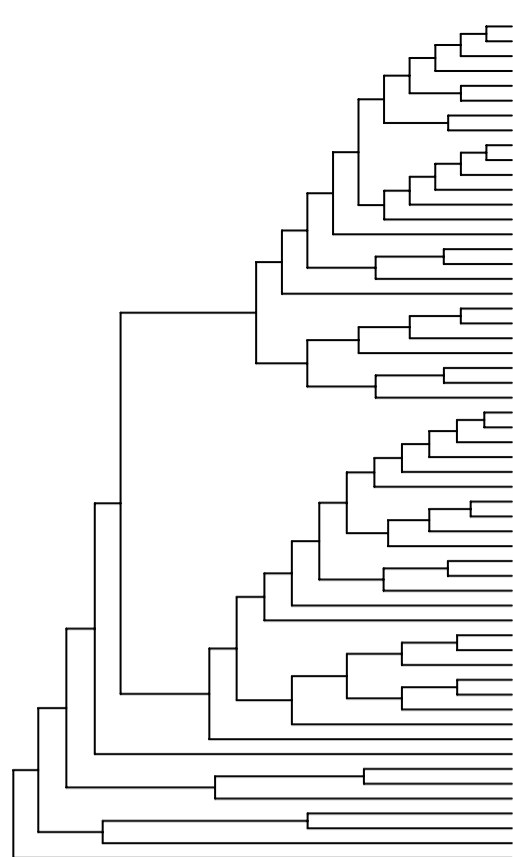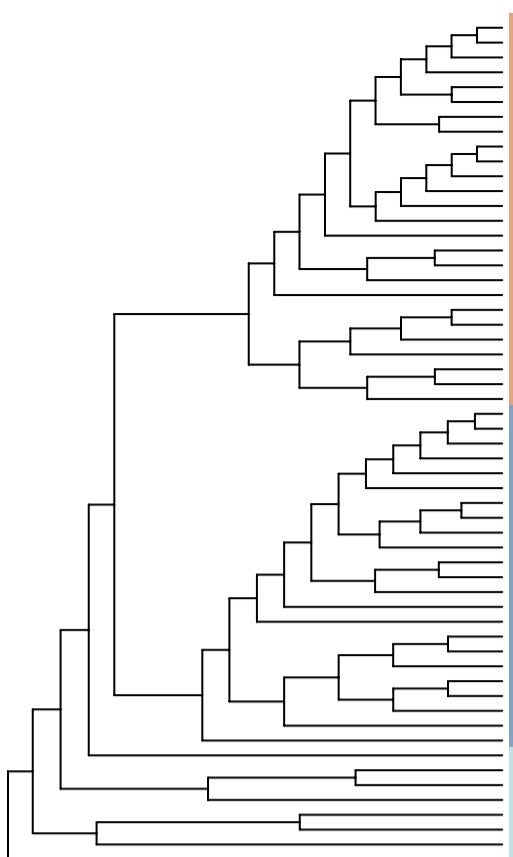

O.B. Saturniidae Sphingidae

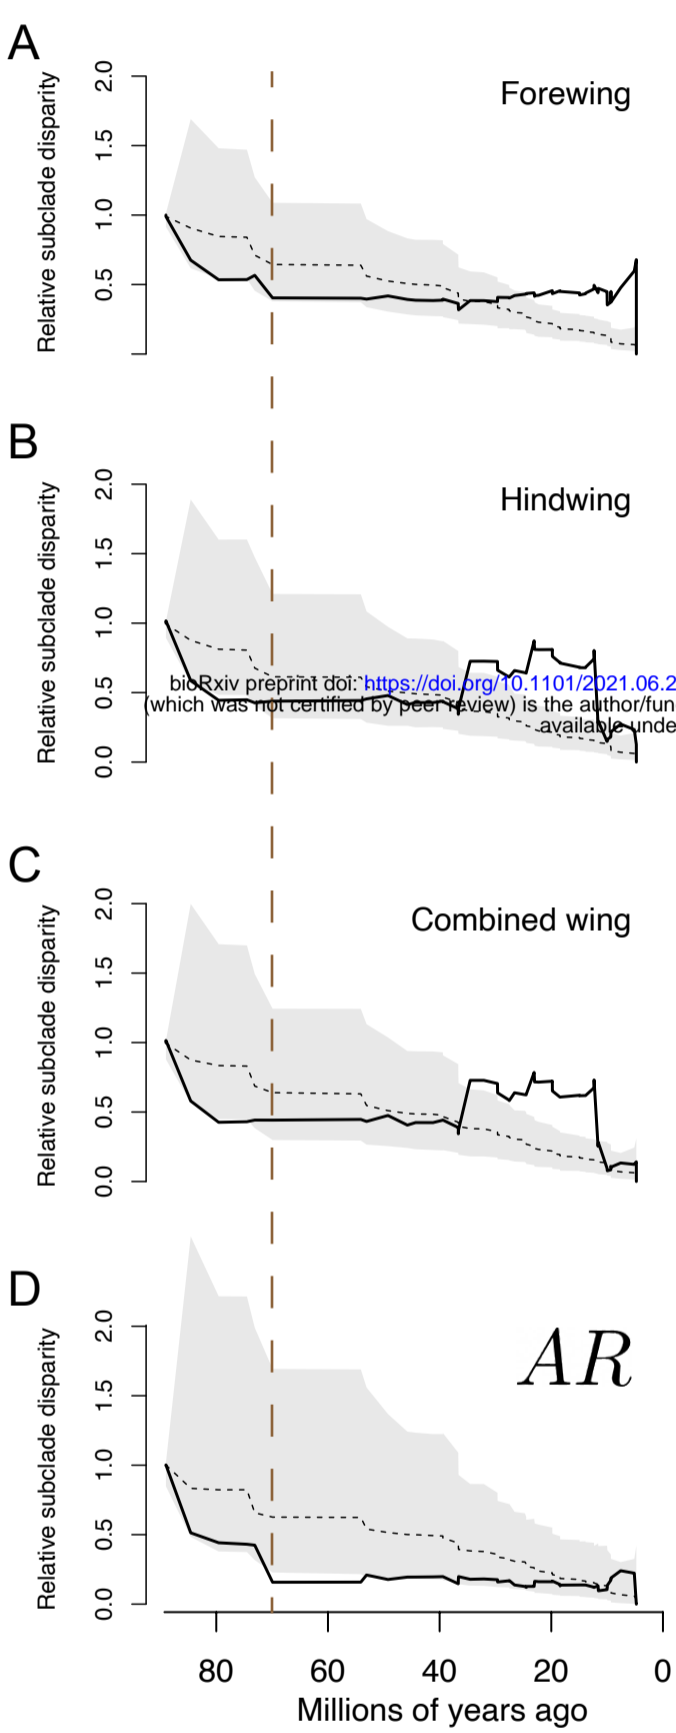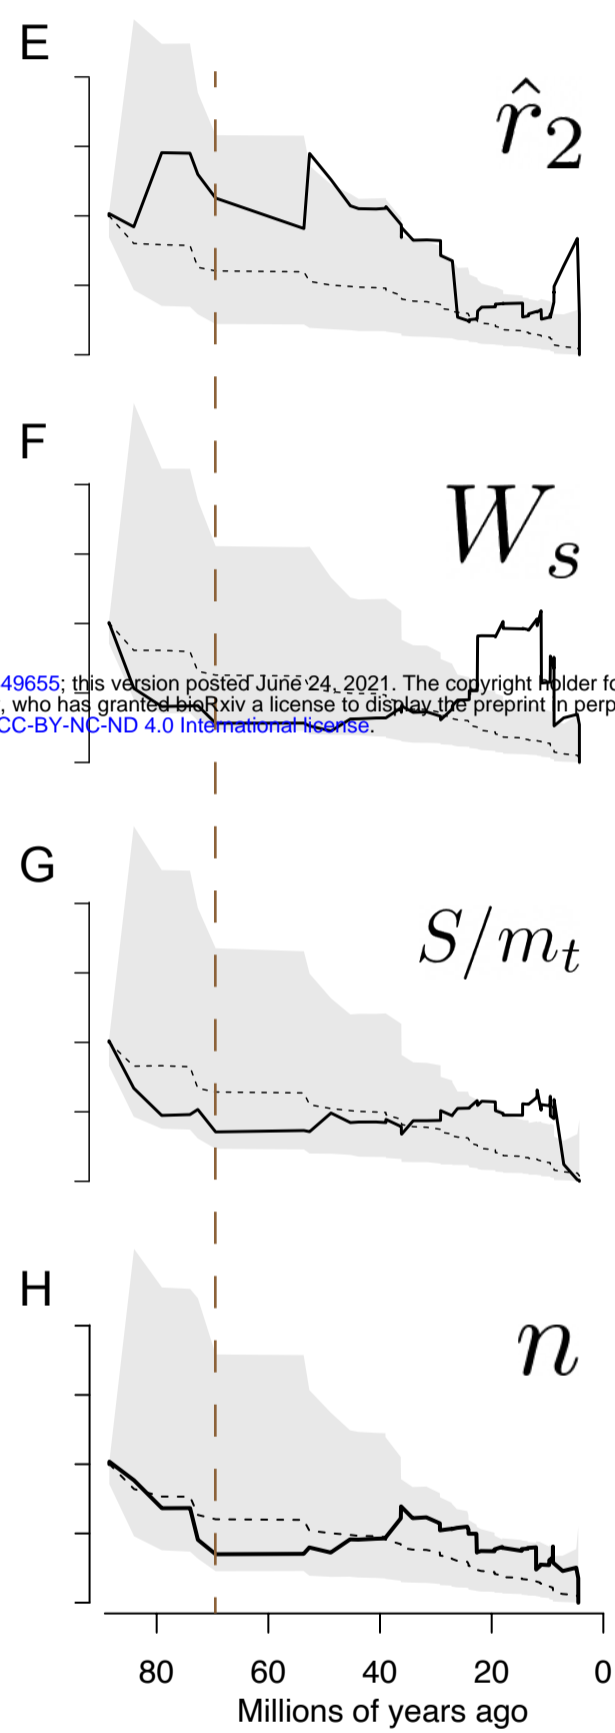

bioRxiv preprint doi: <https://doi.org/10.1101/2021.06.23.449655>; this version posted June 24, 2021. The copyright holder for this preprint (which was not certified by peer review) is the author/funder, who has granted bioRxiv a license to display the preprint in perpetuity. It is made available under aCC-BY-NC-ND 4.0 International license.

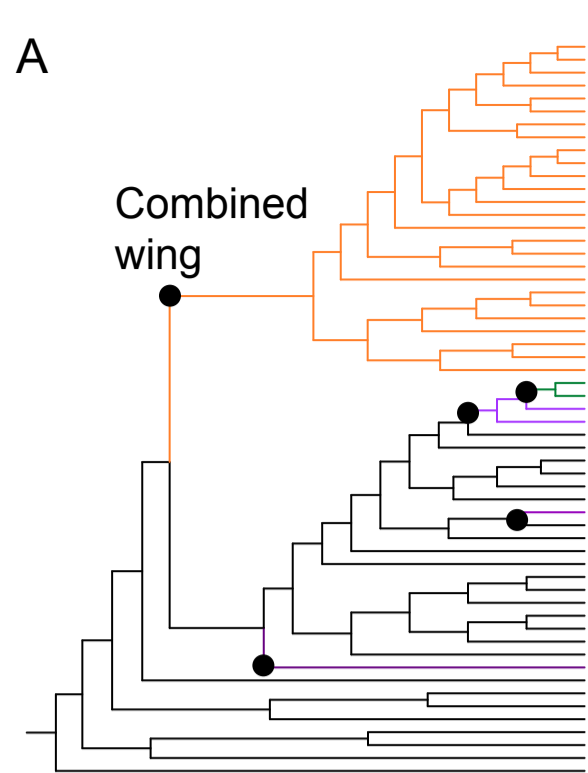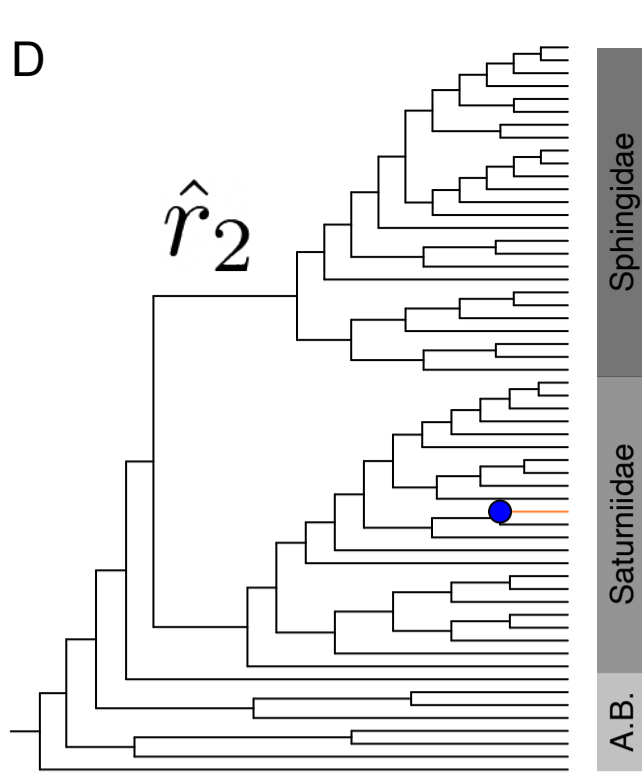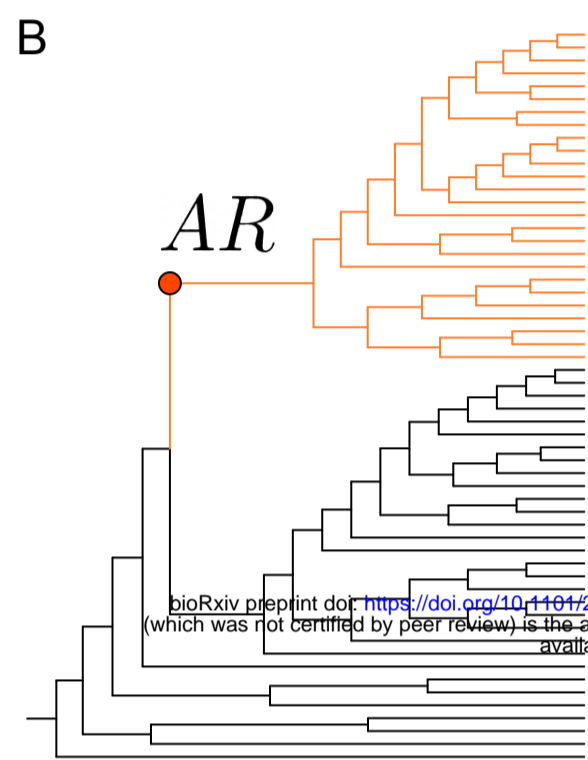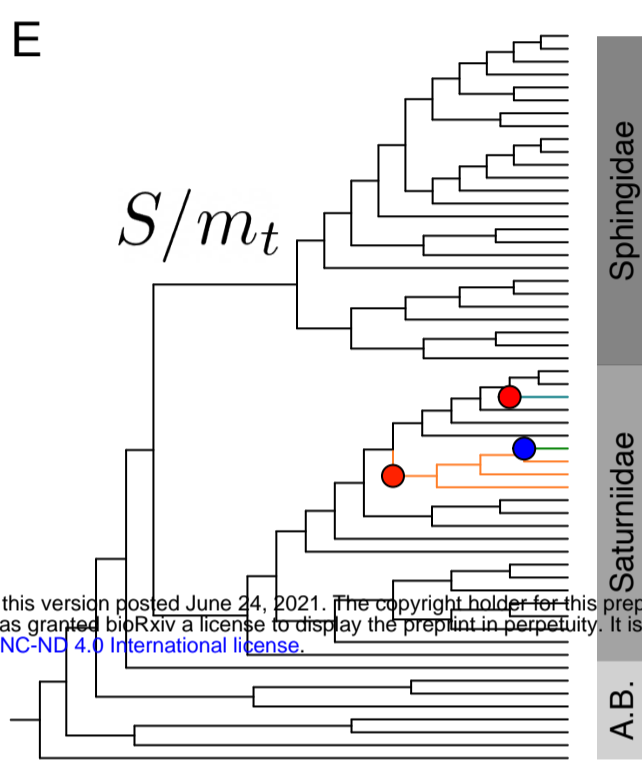

bioRxiv preprint doi: <https://doi.org/10.1101/2021.06.23.449655>; this version posted June 24, 2021. The copyright holder for this preprint (which was not certified by peer review) is the author/funder, who has granted bioRxiv a license to display the preprint in perpetuity. It is made available under aCC-BY-NC-ND 4.0 International license.

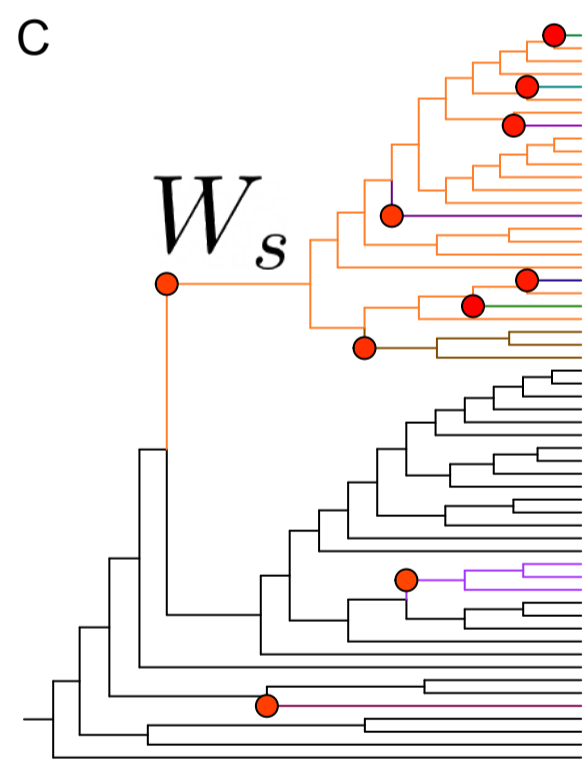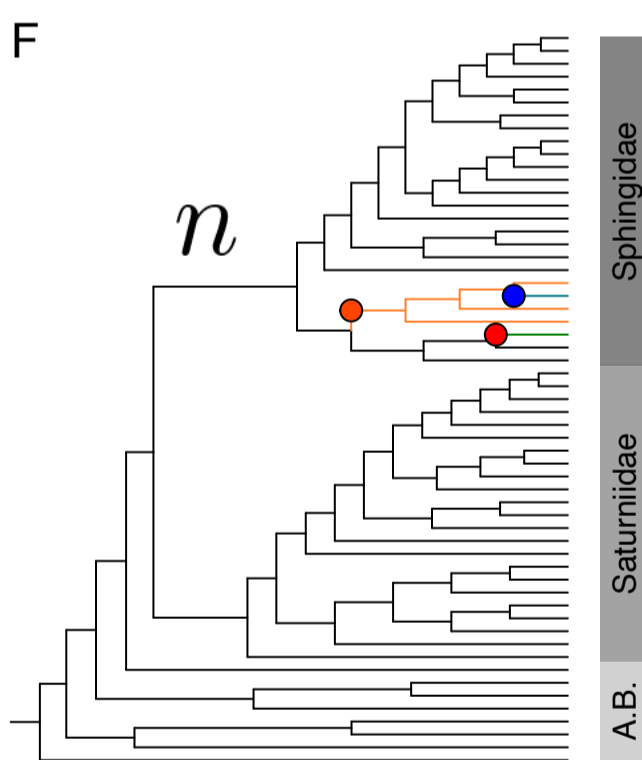

Source: http://biorxiv.org/content/10.1101/2021.06.23.449655v1.full.pdf
